# Supplementary material for: Efficient visible-light-driven Suzuki coupling reaction over Co-doped BiOCl/Ce-doped Bi2O2CO3 composites
Source: Royal Society of Chemistry journal article supplement (doi:10.1039/d0gc04206d), 2021-01-01
Supplement: d0gc04206d1.pdf [file d0gc04206d1.pdf]

***Supporting Information (SI)***

**Efficient visible-light-driven Suzuki-coupling reaction over Co-doped BiOCl/Ce-doped Bi<sub>2</sub>O<sub>2</sub>CO<sub>3</sub> composite**

Danxia Zhao<sup>a</sup>, Guo-ping Lu<sup>a</sup> and Chun Cai \*<sup>a</sup>

<sup>a</sup> *Chemical Engineering College, Nanjing University of Science & Technology, 200 Xiaolingwei, Nanjing 210094, P. R. China\**

Tel.: +86-25-84315514; Fax: +86-25-84315030 ; e-mail: [c.cai@njust.edu.cn](mailto:c.cai@njust.edu.cn)

**Section S1:** Experimental, Characterization, Computational methodologies and models.

**Scheme S1.** Schematic of the Ce-doped  $\text{Bi}_2\text{O}_2\text{CO}_3$  and Co-doped  $\text{BiOCl}/\text{Ce-doped Bi}_2\text{O}_2\text{CO}_3$  (CBCB) composite synthesis.

**Fig. S1** TEM and HRTEM images of BB.

**Fig.S2** XPS spectra of the CBCB composite: (a) full spectrum, (b) Bi 4f, (c) O 1s, (d) C 1s, (e) Cl 2p, (f) Ce 3d, and (g) Co 2p.

**Fig. S3** plots of  $(\alpha h\nu)^2$  or  $(\alpha h\nu)^{1/2}$  vs  $(h\nu)$  for the band gap energy of the samples.

**Fig. S4** XPS-VB spectra of the samples.

**Fig. S5.** EPR spectra of CBCB.

**Fig. S6** XRD (a), SEM images (b) before and after the photocatalytic reaction.

**Fig. S7.** The TEM and HRTEM images of the recovered CBCB.

**Fig. S8** (a) The band structures, and (b) total density of states and local density of states of  $\text{BiOCl}$  and  $\text{C Bi}_2\text{O}_2\text{CO}_3$ .

**Fig. S9** Photocurrent responses of Co-doped  $\text{BiOCl}$ , Ce-doped  $\text{Bi}_2\text{O}_2\text{CO}_3$  and Co-doped  $\text{BiOCl}/\text{Ce-doped Bi}_2\text{O}_2\text{CO}_3$  heterojunction.

**Table S1.** Comparison of the catalytic activity of Co-doped  $\text{BiOCl}/\text{Ce-doped Bi}_2\text{O}_2\text{CO}_3$  (CBCB) composite with conventional heterogeneous Pd catalysts in Suzuki reactions using bromobenzene and phenylboronic acid as substrates.

**Table S2.** Comparison of the photocatalytic activity of Co-doped  $\text{BiOCl}/\text{Ce-doped Bi}_2\text{O}_2\text{CO}_3$  (CBCB) composite with previous photocatalysts in photocatalytic Suzuki reactions using bromobenzene and phenylboronic acid as substrates.

**Table S3.** The scope of Suzuki cross-coupling reactions with different substituents.

**Table S4.** ICP-MS analysis of Co or Ce in CBCB before and after the photocatalytic reaction.

## Section S1.

### Experimental Methods

#### Preparation of BiOCl and Co-doped BiOCl

In general, the synthesis of BiOCl is similar with the method in previous work <sup>1</sup>. 5 mmol BiCl<sub>3</sub> and 5 mmol KMnO<sub>4</sub> were each dissolved in a mixture of 20 mL of ethylene glycol and 20 mL of deionized water. Subsequently, the prepared BiCl<sub>3</sub> solution was injected into the KMnO<sub>4</sub> solution under continuous stirring. After stirring at room temperature for another 2 h, the obtained mixture was transferred into a 50 mL Teflon-lined autoclave and heated at 160 °C for 6 hours. The powders were washed with distilled water and anhydrous ethanol for three times, respectively. Then, powders were dried in vacuum at 70 °C for 12 h. Pure Co-doped BiOCl was prepared by the same method except that 0.6 mmol of cobaltous nitrate hexahydrate Co(NO<sub>3</sub>)<sub>2</sub>•6H<sub>2</sub>O was added to the mixed solution.

#### Preparation of Bi<sub>2</sub>O<sub>2</sub>CO<sub>3</sub> and Ce-doped Bi<sub>2</sub>O<sub>2</sub>CO<sub>3</sub>

The Bi<sub>2</sub>O<sub>2</sub>CO<sub>3</sub> precursor was synthesized by a hydrothermal method according to previously described process <sup>2</sup> with some modifications. 4 mmol bismuth citrate and 335 mg of cetyltrimethylammonium bromide (CTAB) were dispersed in 40 mL deionized water, then stirred for 30 min to form a homogeneous suspension (named as solution A).; 4 mmol Na<sub>2</sub>CO<sub>3</sub> were added to 30 mL deionized water (denoted as solution B). Following this, solution B was dropped into solution A with constant stirring. After another 30 min of stirring, the obtained mixture was moved to a 100 mL Teflon-lined stainless steel autoclave and heated at 160 °C for 24 h. After being cooled down to room temperature naturally, the product was collected and washed several times with deionized water and absolute ethanol, then dried at 70°C for 12 h. Ce-doped Bi<sub>2</sub>O<sub>2</sub>CO<sub>3</sub> was prepared by the same method except that 0.6 mmol of Cerium nitrate hexahydrate Ce(NO<sub>3</sub>)<sub>3</sub>•6H<sub>2</sub>O was added to the mixed solution.

#### Preparation of Co-doped BiOCl/Ce-doped Bi<sub>2</sub>O<sub>2</sub>CO<sub>3</sub>

In a typical procedure, 200 mg Ce-Bi<sub>2</sub>O<sub>2</sub>CO<sub>3</sub> and 5 mmol KMnO<sub>4</sub> were each dissolved in 20 ml of de-ionized water, and the former was ultrasonically dispersed for 30 min to form a homogeneous suspension (denoted as solution A). 5 mmol BiCl<sub>3</sub> and 0.6 mmol Co(NO<sub>3</sub>)<sub>2</sub>•6H<sub>2</sub>O were dissolved in 30 ml ethylene glycol to form a homogeneous solution B. Subsequently, the prepared A and B solutions were added dropwise to the KMnO<sub>4</sub> solution under continuous stirring. After 2 h, the obtained mixture was moved to a 100 mL Teflon-lined stainless steel autoclave and heated at 160 °C for 6 h and a brown powder product was obtained. Finally, the powder (named as CBBC) was centrifuged and washed with de-ionized water and ethanol several times before being dried at 70 °C for 12 h. For comparison, the BiOCl/Bi<sub>2</sub>O<sub>2</sub>CO<sub>3</sub> composite was prepared according to the same procedure except for the precursor without cobalt and cerium ions, and marked as BB.

## Characterization of photocatalysts

X-ray diffractometry (XRD) using a Shimadzu XRD-6000 diffractometer with Cu K $\alpha$  irradiation. Scanning electron microscopy (SEM) images was performed using a Hitachi S-4800. TEM images were taken using a PHILIPS Tecnai 12 microscope operating at 120 kv. Energy Dispersive X-ray Spectroscopic analysis (EDS) was performed with a JEM-2010(HR) transmission electron microscope at an acceleration voltage of 200kV. High Resolution Transmission electron microscopy (HRTEM) was performed on Philips-FEI Tecnai G2 F20 operating at 300kv. Nitrogen adsorption-desorption analysis was conducted using a Micromeritics ASAP 2020 at 77 K. In addition, X-ray photoelectron spectroscopy (XPS) was performed on an ESCALAB 250Xi spectrometer, using an Al K $\alpha$  X-ray source (1486.6 eV of photons), which was calibrated by setting the C 1s peak to 284.80 eV. Inductively coupled plasma mass spectrometer (ICP-MS) was analyzed on Optima 7300DV. The UV - Vis diffuse reflectance spectra of the catalysts were recorded on a UV - Vis spectrometer (Lambda 750) within the range of 200 - 1100 nm. Photoluminescence spectra (PL) of the catalysts were carried out on a spectrophotometer (LabRAM HR Evolution).

## Electrochemical measurements

Electrochemical and photoelectrochemical measurements were carried out on an electrochemical workstation (CHI 660E, Shanghai) with a standard three-electrode system. The powder coated on indium-tin-oxide (ITO) glass substrate was applied as the working electrode. 10 mg powder was suspended into 1 mL absolute ethanol and then the slurry was dropwise added on a ITO substrate (15mm  $\times$  30 mm). The working electrode was exposed to air for 10 h to remove the ethanol. Platinum wire and Ag/AgCl electrode were used as the counter electrode and reference electrode, respectively. The electrolyte was 0.1 M Na<sub>2</sub>SO<sub>4</sub> solution and illumination source was a 300 W Xe lamp providing simulated solar light.

## EPR experiment

The h<sup>+</sup> radical signals in solution in the dark were determined using electron spin resonance (EPR; JES FA200).

## Computational methodologies and models

First-principle calculations within the framework of density functional theory (DFT) were performed by employing the program Vienna *ab initio* simulation package (VASP)<sup>3</sup>. The valence electronic states are described using periodic plane wave and the electron-ion interactions are described by the projector augmented wave (PAW) approach<sup>4</sup>. The exchange and correlation potential is treated by the generalized gradient approximation (GGA) in the Perdew-Burke-Ernzerhof (PBE) form<sup>5</sup>. The valence electron configurations included in the calculations are Bi (6s<sup>2</sup>6p<sup>3</sup>), Cl (3s<sup>2</sup>3p<sup>5</sup>), O (2s<sup>2</sup>2p<sup>4</sup>), C (2s<sup>2</sup>2p<sup>2</sup>), Co (3d<sup>8</sup>4s<sup>1</sup>),

and Ce ( $4f^1 5s^2 5p^6 5d^1 6s^2$ ). The cutoff energy of plane-wave basis is set to be 400 eV. The lattice constants and atomic positions were both fully relaxed until electronic self-consistent and Hellmann-Feynman forces on atoms converge were reached at  $10^{-6}$  eV and  $0.005\text{eV}/\text{\AA}$ , respectively. The Brillouin zone was sampled by the Monkhorst-Pack <sup>6</sup> k-point grid with densities of  $0.2 \text{\AA}^{-1}$ .

To construct the aspired interface structures, the (001) surfaces of both BiOCl and  $\text{Bi}_2\text{O}_2\text{CO}_3$  were employed to decrease the misfit. By cleaving fully relaxed bulk materials perpendicular to *c*-axis, the exposed (001) facets of BiOCl and  $\text{Bi}_2\text{O}_2\text{CO}_3$  surfaces are constructed. The BiOCl/ $\text{Bi}_2\text{O}_2\text{CO}_3$  heterostructures are constructed by putting two surface slabs together. The interface model employed the average size of both BiOCl and  $\text{Bi}_2\text{O}_2\text{CO}_3$  slabs to make a small mismatch ( $\sim 1\%$ ) along the *a*- and *b*-axis.

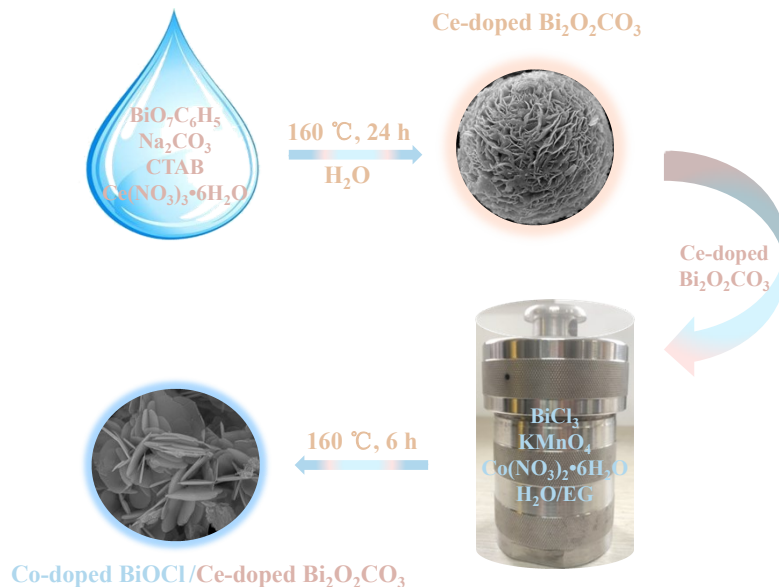

**Scheme S1.** Schematic of the Ce-doped  $\text{Bi}_2\text{O}_2\text{CO}_3$  and Co-doped  $\text{BiOCl}/\text{Ce-doped Bi}_2\text{O}_2\text{CO}_3$  (CBCB) composite synthesis.

The  $\text{CO}_3^{2-}$  groups are interleaved into the stack of  $(\text{Bi}_2\text{O}_2)^{2+}$  sheets to flower-like form  $\text{Bi}_2\text{O}_2\text{CO}_3$ .  $\text{Bi}_2\text{O}_2\text{CO}_3$  acts as the precursor to mediate the subsequent growth of  $\text{BiOCl}$  nanosheets.  $\text{Bi}_2\text{O}_2\text{CO}_3$  and  $\text{BiOCl}$  have similar aurivillius structure, and the shared layers with alternative stacking  $(\text{Bi}_2\text{O}_2)^{2+}$  sheets were interleaved by  $\text{CO}_3^{2-}$  or  $\text{Cl}^-$  groups for  $\text{BiOCl}/\text{Bi}_2\text{O}_2\text{CO}_3$  composite. Shown as Scheme 1, the  $\text{BiOCl}/\text{Bi}_2\text{O}_2\text{CO}_3$  composites retain the original flower-like shape of the  $\text{Bi}_2\text{O}_2\text{CO}_3$  precursor. This means that the  $\text{BiOCl}$  nanosheets are in situ formed and have intimate contacts with the  $\text{Bi}_2\text{O}_2\text{CO}_3$  nanosheets to form heterojunction, which can effectively facilitate the transfer of photogenerated charge carriers between them.

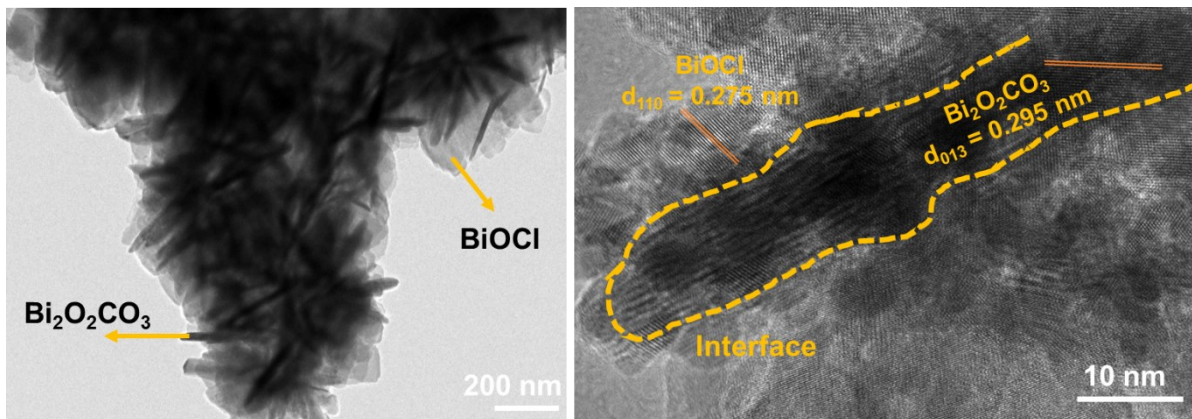

**Fig. S1** TEM and HRTEM images of BB.

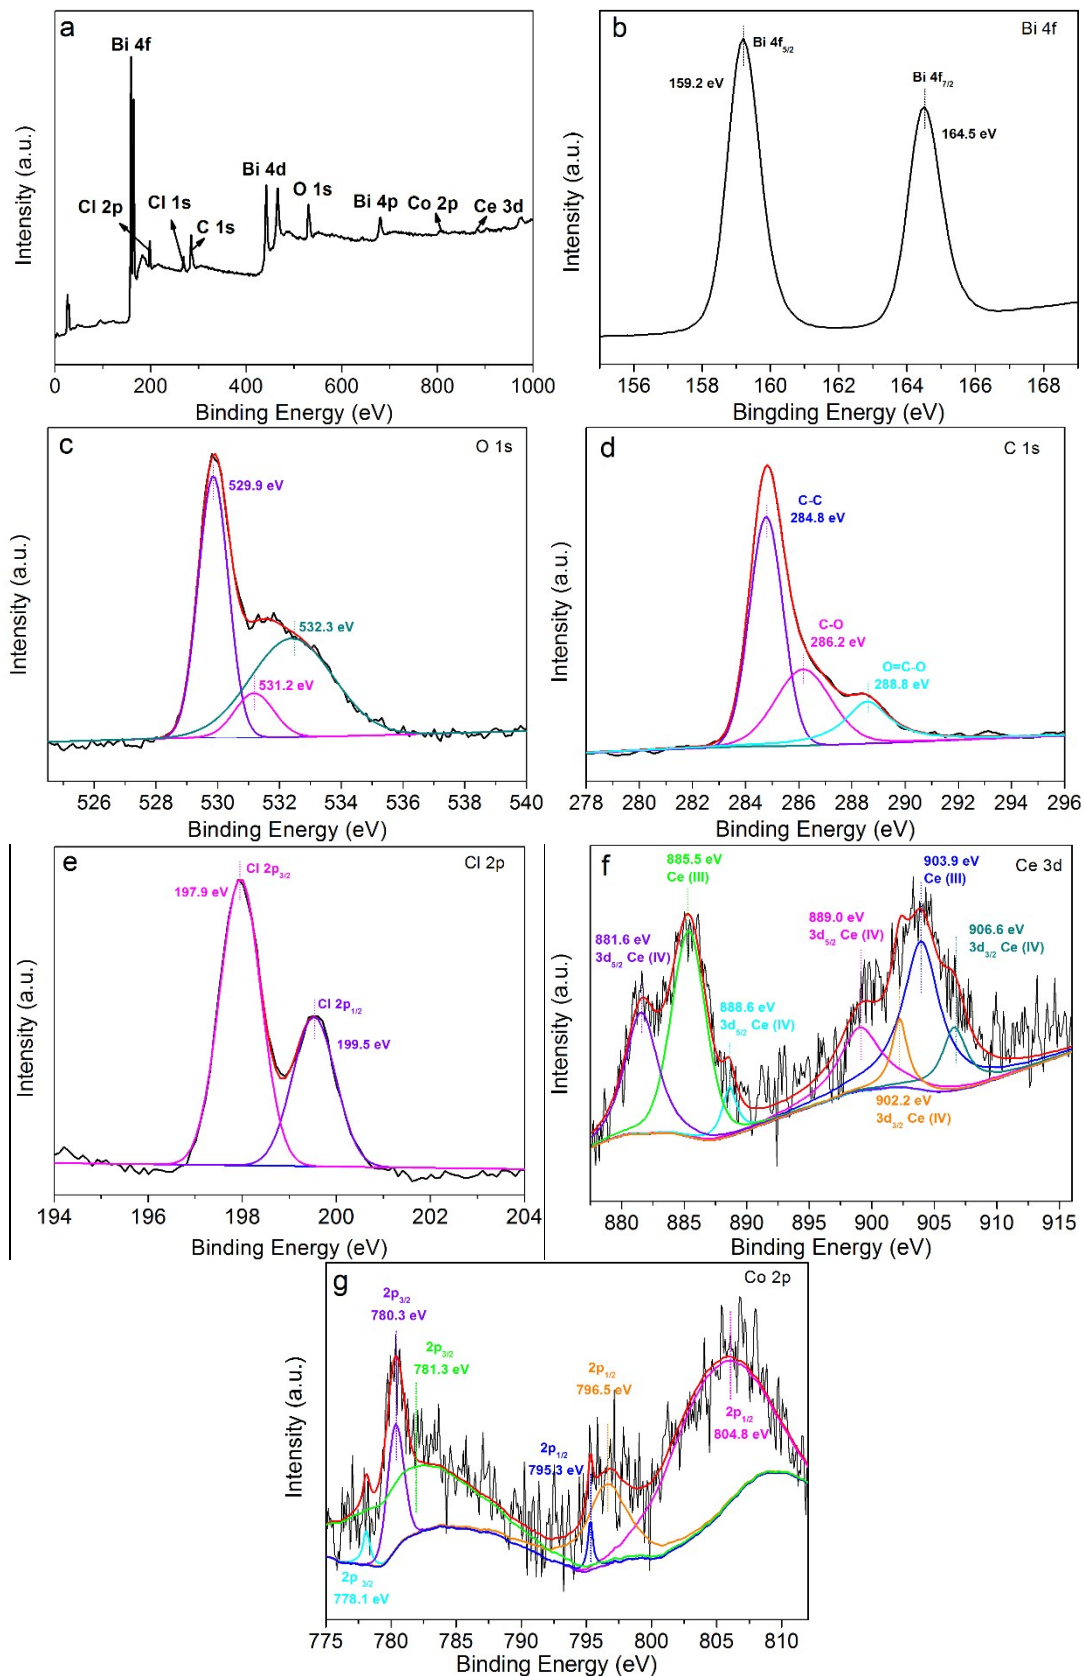

**Fig. S2** XPS spectra of the CBCB composite: (a) full spectrum, (b) Bi 4f, (c) O 1s, (d) C 1s, (e) Cl 2p, (f) Ce 3d, and (g) Co 2p.



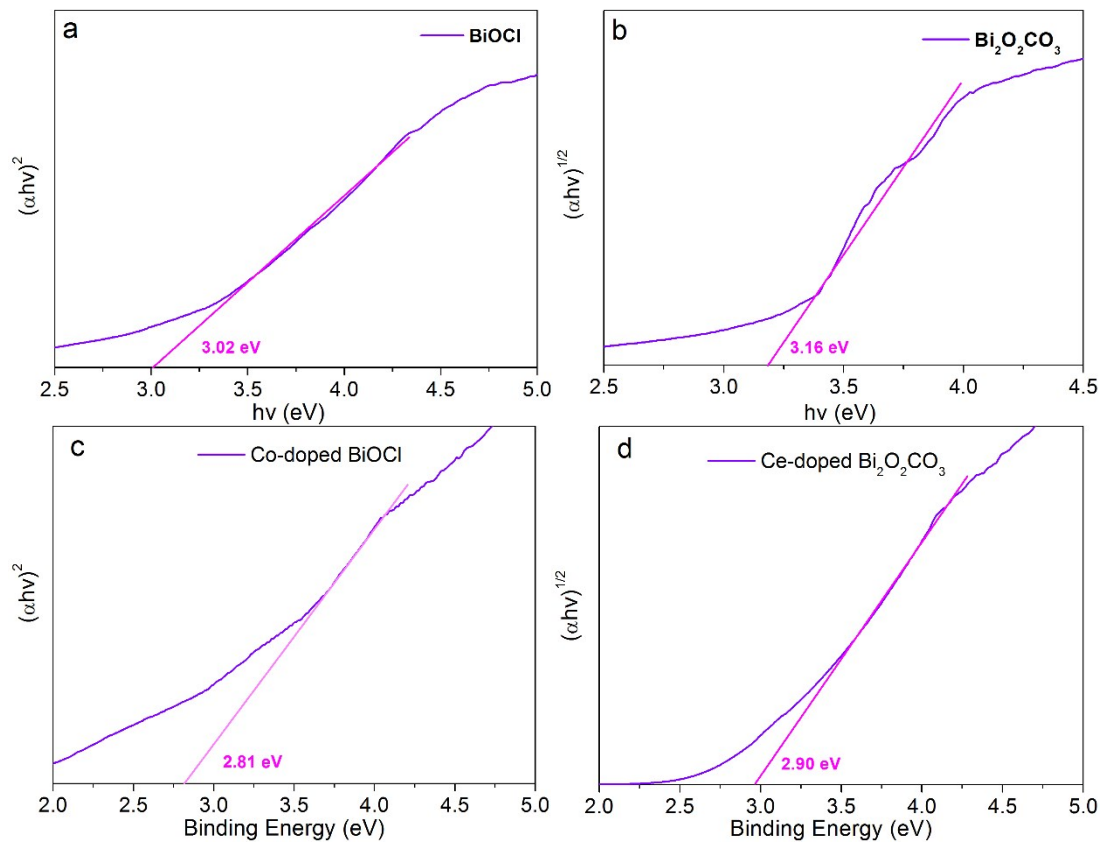

**Fig. S3** plots of  $(\alpha h\nu)^2$  or  $(\alpha h\nu)^{1/2}$  vs  $(h\nu)$  for the band gap energy of the samples.

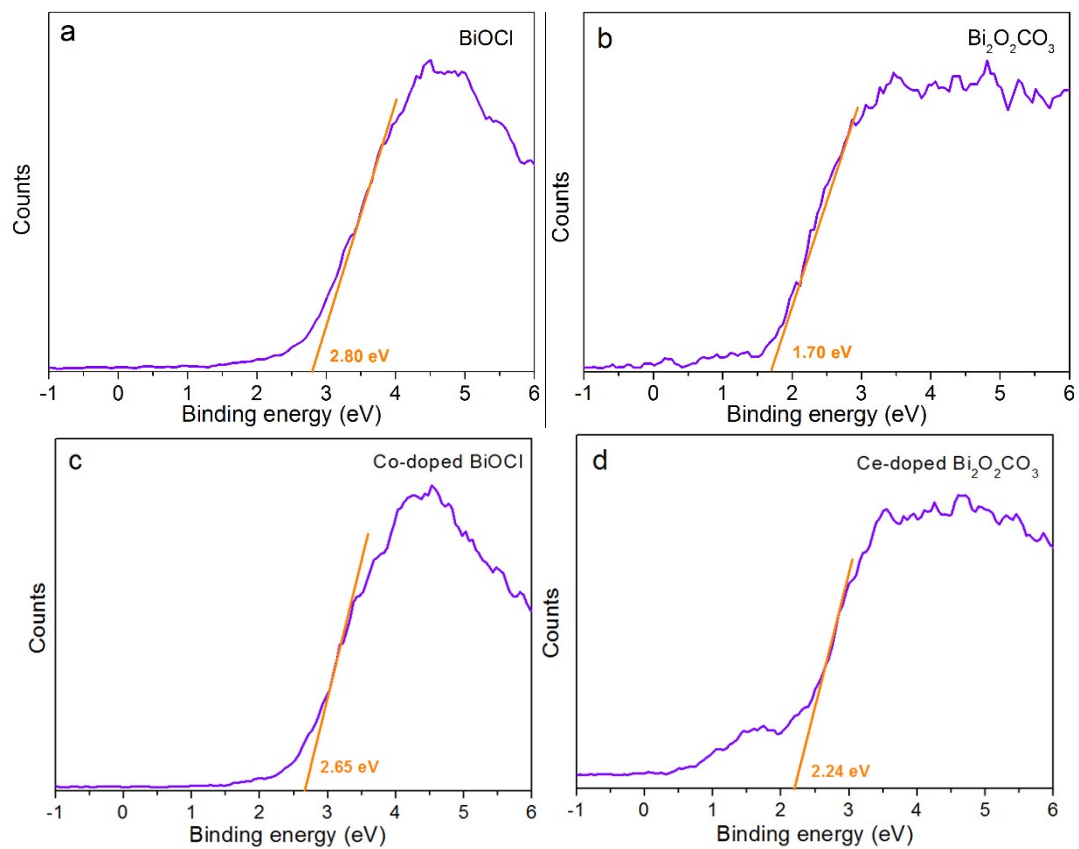

**Fig. S4.** XPS-VB spectra of the samples.

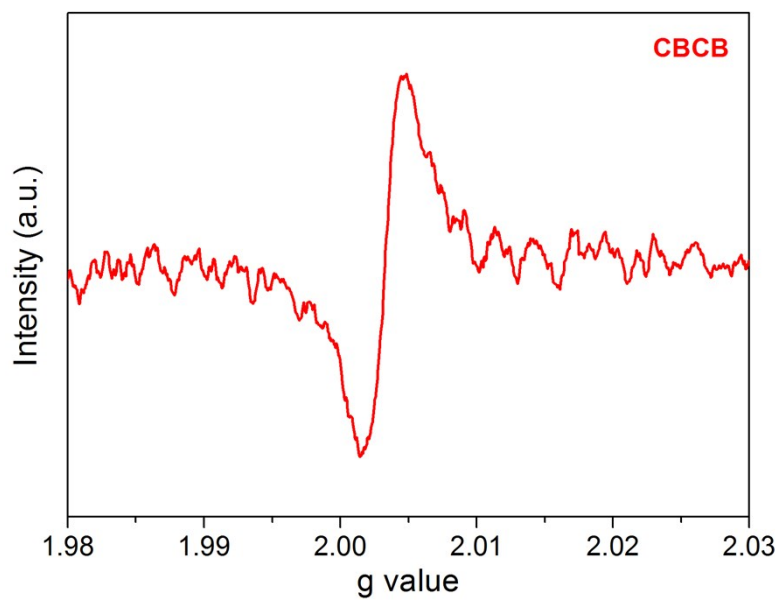

**Fig. S5.** EPR spectra of CBCB.

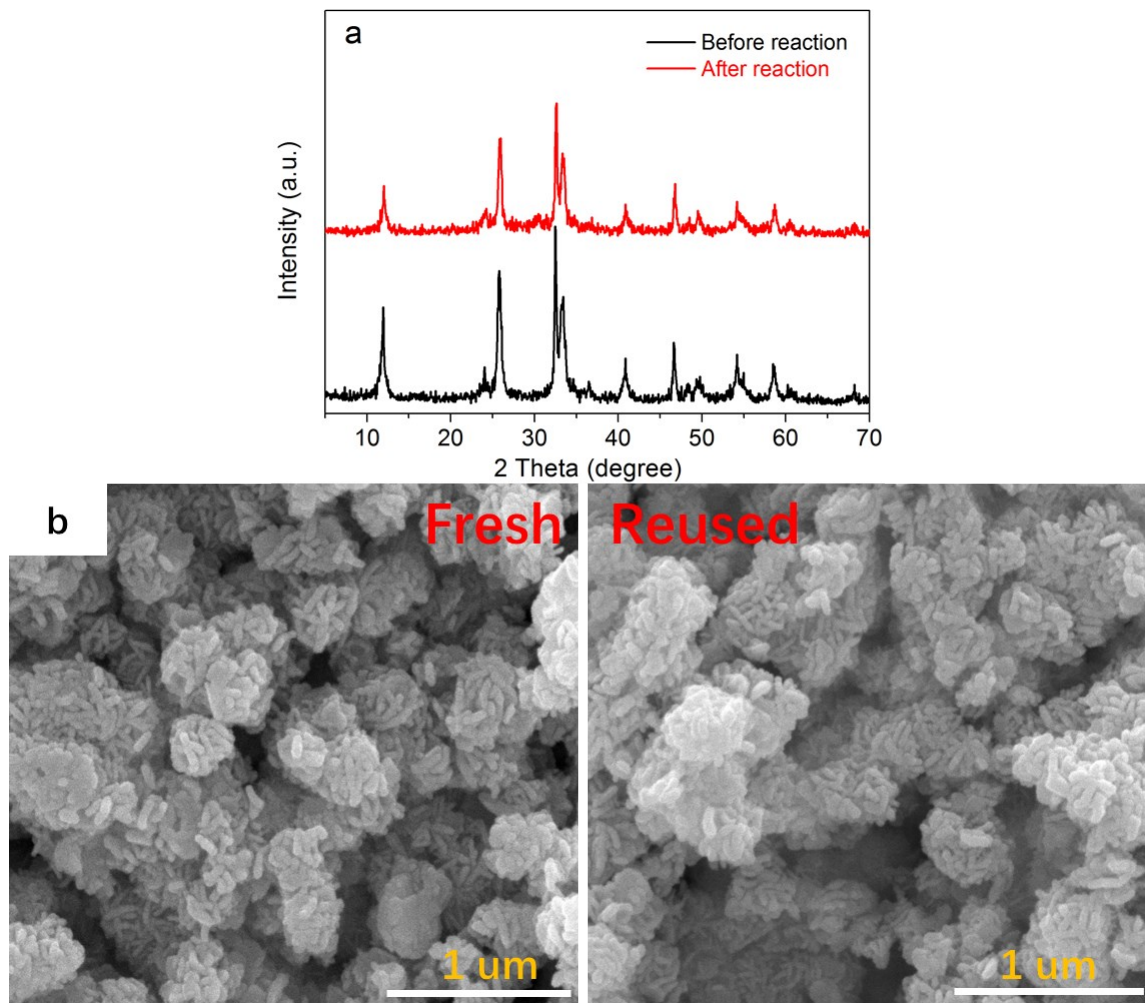

**Fig. S6.** XRD (a), SEM images (b) before and after the photocatalytic reaction.

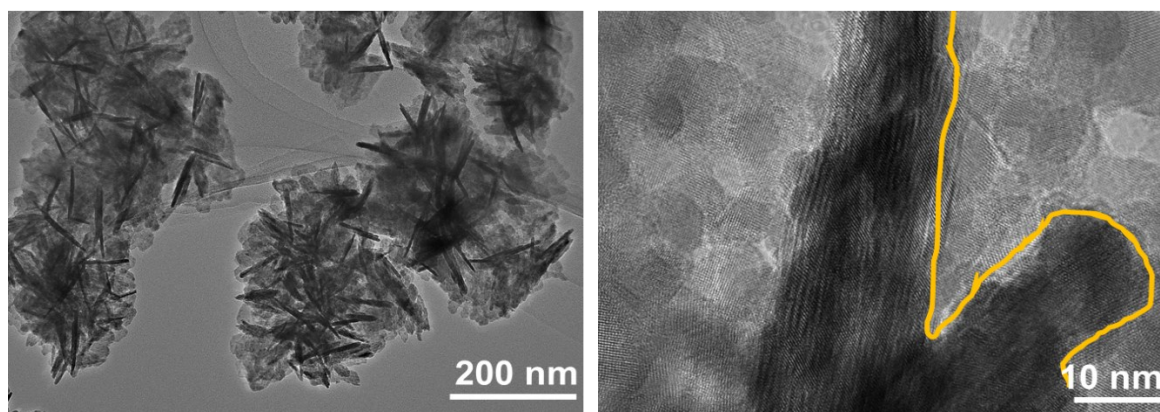

**Fig. S7.** The TEM and HRTEM images of the recovered CBCB.

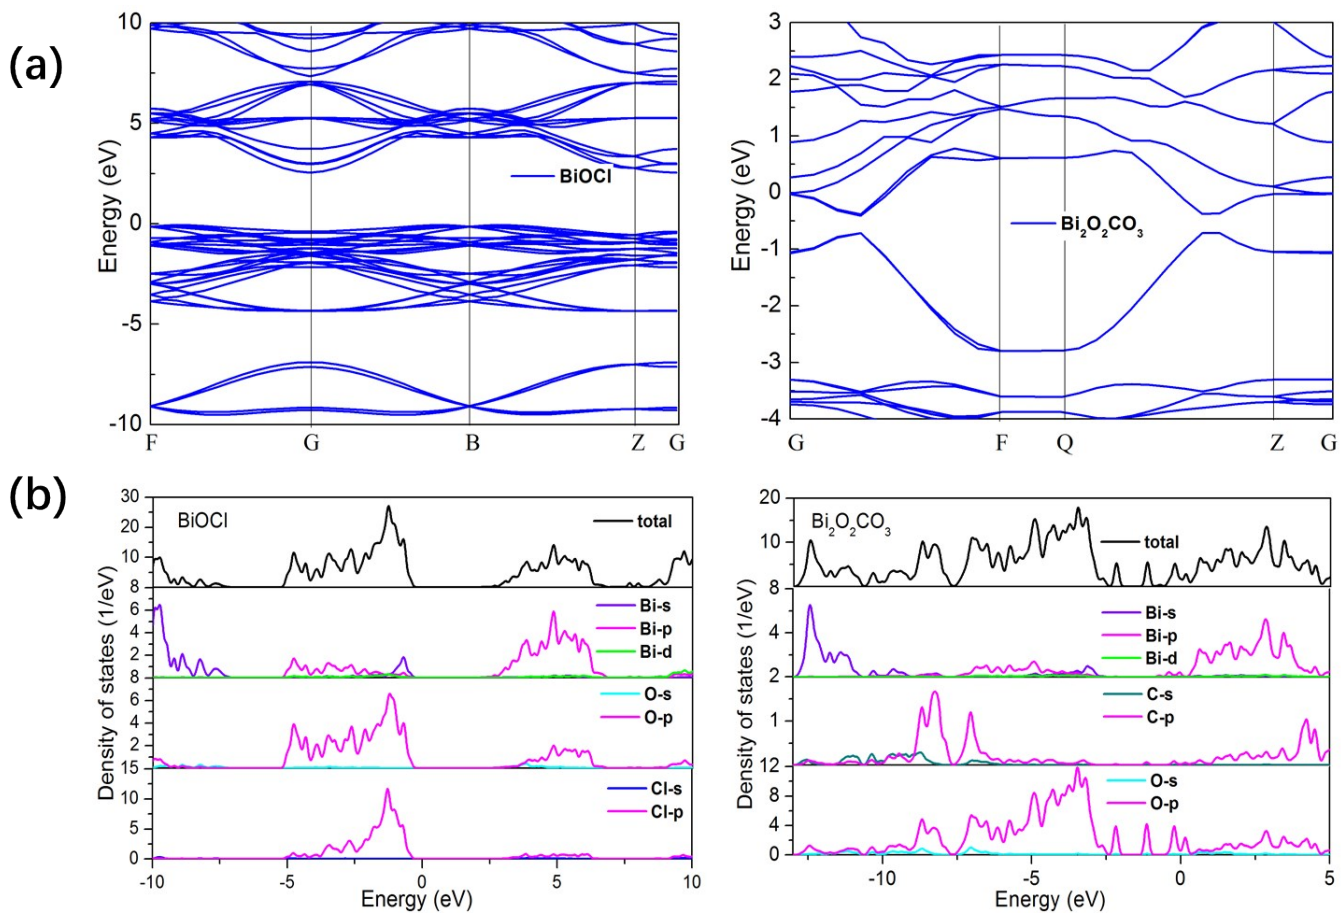

**Fig. S8** (a) The band structures, and (b) total density of states and local density of states of BiOCl and C Bi<sub>2</sub>O<sub>2</sub>CO<sub>3</sub>.

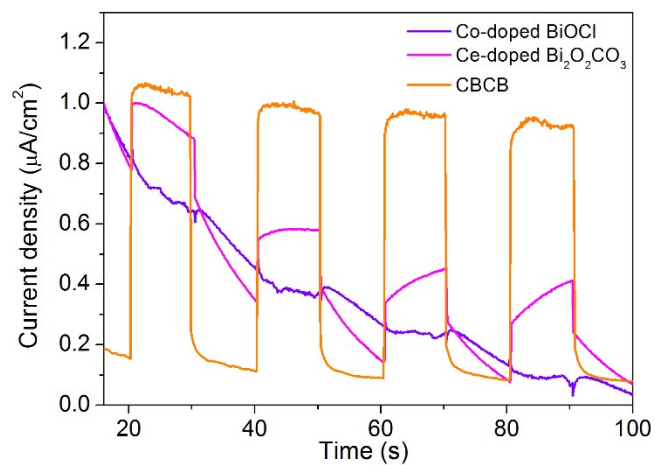

**Fig. S9.** The photocurrent responses of Co-doped BiOCl, Ce-doped  $\text{Bi}_2\text{O}_2\text{CO}_3$  and Co-doped BiOCl/Ce-doped  $\text{Bi}_2\text{O}_2\text{CO}_3$  heterojunction.

**Table S1.** Comparison of the catalytic activity of Co-doped BiOCl/Ce-doped Bi<sub>2</sub>O<sub>2</sub>CO<sub>3</sub> (CBCB) composite with conventional heterogeneous Pd catalysts in Suzuki reactions using bromobenzene and phenylboronic acid as substrates

| Entry    | Catalysts                                       | Conditions                           | Yield [%] |
|----------|-------------------------------------------------|--------------------------------------|-----------|
| <b>1</b> | <b>palladium-free CBCB in this work</b>         | <b>RT, EtOH/H<sub>2</sub>O, 16 h</b> | <b>91</b> |
| 2        | Pd-G-3 <sup>7</sup>                             | Reflux, EtOH, 24 h                   | 42        |
| 3        | G4-OH Pd NPs <sup>8</sup>                       | 153 °C, DMF, 48 h                    | 70        |
| 4        | MUA-Pd <sup>9</sup>                             | 90 °C, DMF, 12 h                     | 92        |
| 5        | Pd-Fe <sub>3</sub> O <sub>4</sub> <sup>10</sup> | Reflux, DME/H <sub>2</sub> O, 48 h   | 70        |
| 6        | Pd-CNT-ED-OH <sup>11</sup>                      | 120 °C, DMF, 24 h                    | 90        |
| 7        | Pd@MTiO <sub>2</sub> <sup>12</sup>              | 70°C, H <sub>2</sub> O, 4 h          | 95        |
| 8        | Pd-DBS-CONHNH <sub>2</sub> <sup>13</sup>        | 50°C, EtOH/H <sub>2</sub> O, 18 h    | 86        |
| 9        | Y <sub>3</sub> Pd <sub>2</sub> <sup>14</sup>    | 60°C, DMF/H <sub>2</sub> O, 8 h      | 98        |
| 10       | PdO <sub>x</sub> /NiO NFs <sup>15</sup>         | 35°C, EtOH/H <sub>2</sub> O, 2 h     | 85        |
| 11       | HEC-NHC-Pd <sup>16</sup>                        | 60 °C, EtOH/H <sub>2</sub> O, 2 h    | 97        |

**Table S2.** Comparison of the photocatalytic activity of Co-doped BiOCl/Ce-doped Bi<sub>2</sub>O<sub>2</sub>CO<sub>3</sub> (CBCB) composite with previous photocatalysts in photocatalytic Suzuki reactions using bromobenzene and phenylboronic acid as substrates

| Entry    | Catalysts                                                               | Conditions                                                           | Yield [%] |
|----------|-------------------------------------------------------------------------|----------------------------------------------------------------------|-----------|
| <b>1</b> | <b>palladium-free CBCB in this work</b>                                 | <b>RT, EtOH/H<sub>2</sub>O, 16 h, 15 W white LED</b>                 | <b>91</b> |
| 2        | Au-Pd alloy <sup>17</sup>                                               | 30 °C, EtOH/CTAB, 3 h, visible light 0.5 W cm <sup>-2</sup>          | 80        |
| 3        | Pd/Au/PN-CeO <sub>2</sub> <sup>18</sup>                                 | 25 °C, DMF/H <sub>2</sub> O, 1 h, 150 W Xe lamp                      | 98        |
| 4        | Pd-MoS <sub>2</sub> nanosheets <sup>19</sup>                            | EtOH/H <sub>2</sub> O, Solar-light 12:00 PM to 14:00 PM              | 80        |
| 5        | NiFe <sub>2</sub> O <sub>4</sub> /2D MoS <sub>2</sub> -Pd <sup>20</sup> | 30 °C, EtOH/H <sub>2</sub> O, 5 h, 300 W Xe lamp                     | 43        |
| 6        | HUY@S-TOH/AuPd <sup>21</sup>                                            | 25 °C, EtOH/H <sub>2</sub> O, 3 h, 300 W Xe lamp                     | 88        |
| 7        | St-MOP@Pd-2 <sup>22</sup>                                               | 25 °C, MeOH, 5h, white LED (0.9 mW cm <sup>-2</sup> )                | 51        |
| 8        | Pd@NiO <sub>80</sub> /SiC <sup>23</sup>                                 | 30 °C, DMF/H <sub>2</sub> O, 5 h, Xe lamp (0.35 W cm <sup>-2</sup> ) | 83        |
| 9        | Pd-Azo-POP <sup>24</sup>                                                | 25 °C, EtOH/H <sub>2</sub> O, 4 h, 350 W Xe lamp                     | 99        |
| 10       | Pd/PbTiO <sub>3</sub> <sup>25</sup>                                     | 80 °C, EtOH/H <sub>2</sub> O, 20 min, UV (300 W) + MW (600 W)        | 78        |
| 11       | CoPc/NiO <sup>26</sup>                                                  | 27 ± 2 °C, DMF/H <sub>2</sub> O, 8 h, 20 W white LED                 | 78        |



**Table S3.** The scope of Suzuki cross-coupling reactions with different substituents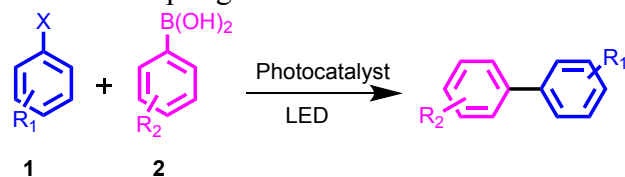

| Entry | Reactant 1 | Reactant 2 | Product | Yield (%) <sup>b</sup> |
|-------|------------|------------|---------|------------------------|
| 1     |            |            |         | 91                     |
| 2     |            |            |         | 88                     |
| 3     |            |            |         | 71                     |
| 4     |            |            |         | 44                     |
| 5     |            |            |         | 15                     |
| 6     |            |            |         | 20                     |
| 7     |            |            |         | 65                     |
| 8     |            |            |         | 54                     |
| 9     |            |            |         | 32                     |
| 10    |            |            |         | 70                     |
| 11    |            |            |         | 18                     |

<sup>a</sup>Experiment: Halide (0.2 mmol); aryl boronic acid (0.22mmol); K<sub>2</sub>CO<sub>3</sub> (0.45 mmol); CBCB (25 mg); 1:1 EtOH/H<sub>2</sub>O, 3 ml; RT; atmospheric pressure; 16 h; 15 W white LED. <sup>b</sup>Yields were determined by GC-MS and GC with m-xylene as the interior label.

**Table S4.** ICP-MS analysis of Co or Ce in CBCB before and after the photocatalytic reaction.

| Material (CBCB) | Element |    | Metal Content (mg/kg) |           |
|-----------------|---------|----|-----------------------|-----------|
| Before          | Co      | Ce | 9823.8 (Co)           | 2282 (Ce) |
| After           | Co      | Ce | 9612 (Co)             | 2137 (Ce) |

## References

1. S. Niu, R. Zhang and C. Guo, *Mater. Chem. Front.*, 2020, **4**, 2314-2324.
2. Y. Lan, Z. Li, W. Xie, D. Li, G. Yan, S. Guo, C. Pan and J. Wu, *J. Hazard. Mater.*, 2020, **385**, 121622.
3. G. Kresse and J. Furthmüller, *Comp. Mater. Sci.*, 1996, **6**, 15-50.
4. P. E. Blöchl, *Phys. Rev. B*, 1994, **50**, 17953-17979.
5. J. P. Perdew, K. Burke and M. Ernzerhof, *Phys. Rev. Lett.*, 1996, **77**, 3865-3868.
6. J. D. Pack and H. J. Monkhorst, *Physical Review B*, 1977, **16**, 1748-1749.
7. K. R. Gopidas, J. K. Whitesell and M. A. Fox, *Nano Letters.*, 2003, **3**, 1757-1760.
8. M. Pittelkow, K. Moth-Poulsen, U. Boas and J. B. Christensen, *Langmuir.*, 2003, **19**, 7682-7684.
9. M. Cargnello, N. L. Wieder, P. Canton, T. Montini, G. Giambastiani, A. Benedetti, R. J. Gorte and P. Fornasiero, *Chemistry of Materials*, 2011, **23**, 3961-3969.
10. Y. Jang, J. Chung, S. Kim, S. W. Jun, B. H. Kim, D. W. Lee, B. M. Kim and T. Hyeon, *Phys. Chem. Chem. Phys.*, 2011, **13**, 2512-2516.
11. E. Kim, H. S. Jeong and B. M. Kim, *Cata. Commun.*, 2014, **46**, 71-74.
12. P. Mondal, P. Bhanja, R. Khatun, A. Bhaumik, D. Das and S. Manirul Islam, *J. Colloid. Interf. Sci.*, 2017, **508**, 378-386.
13. P. Slavík, D. W. Kurka and D. K. Smith, *Chem. Sci.*, 2018, **9**, 8673-8681.
14. T.-N. Ye, Y. Lu, Z. Xiao, J. Li, T. Nakao, H. Abe, Y. Niwa, M. Kitano, T. Tada and H. Hosono, *Nature Commun.*, 2019, **10**.
15. T. Wang, X. Tao, D. Wu, X. Lu, Q. Yu, S. Liu, H. Chen and B. Li, *The J. Phys. Chem. C*, 2020, **124**, 22539-22549.
16. Y. Dong, J. Bi, S. Zhang, D. Zhu, D. Meng, S. Ming, K. Qin, Q. Liu, L. Guo and T. Li, *Appl. Surf. Sci.* 2020, **531**, 147392.
17. Q. Xiao, S. Sarina, E. Jaatinen, J. Jia, D. P. Arnold, H. Liu and H. Zhu, *Green Chem.*, 2014, **16**.
18. S. Zhang, C. Chang, Z. Huang, Y. Ma, W. Gao, J. Li and Y. Qu, *ACS Catal.*, 2015, **5**, 6481-6488.
19. H. H. Shin, E. Kang, H. Park, T. Han, C.-H. Lee and D.-K. Lim, *J. Mater. Chem. A*, 2017, **5**, 24965-24971.
20. W. Fu, X. Xu, W. Wang, J. Shen and M. Ye, *ACS Sustain. Chem. Eng.*, 2018, **6**, 8935-8944.
21. S. Rohani, A. Ziarati, G. M. Ziarani, A. Badieli and T. Burgi, *Catal. Sci. Technol.*, 2019, **9**, 3820-3827.
22. S. H. Ryu, S. J. Choi, J. H. Seon, B. Jo, S. M. Lee, H. J. Kim, Y.-J. Ko, K. C. Ko, T. K. Ahn and S. U. Son, *Catal. Sci. Technol.*, 2020, **10**, 5535-5543.
23. Z.-F. Jiao, Y.-M. Tian, B. Zhang, C.-H. Hao, Y. Qiao, Y.-X. Wang, Y. Qin, U. Radius, H. Braunschweig, T. B. Marder, X.-N. Guo and X.-Y. Guo, *J. Catal.*, 2020, **389**, 517-524.

24. J. Chakraborty, I. Nath and F. Verpoort, *Chem. Eng. J.*, 2019, **358**, 580-588.
25. J. Wen, L. Ling, Y. Chen and Z. Bian, *Chinese J. Catal.*, 2020, **41**, 1674-1681.
26. P. K. Prajapati, S. Saini and S. L. Jain, *J. Mater. Chem. A*, 2020, **8**, 5246-5254.
